# Supplementary material
Source: Copernicus journal article supplement (doi:10.5194/egusphere-2023-485)
Supplement: Supplementary file [file egusphere-2023-485-AC1-supplement.pdf]

## Response to RC1 comments

This manuscript by Kodama et al. investigated carbon and nitrogen isotope ratios of particulate organic matter (POM) in the upper water column of the southern Sea of Japan based on multiple years' observation to evaluate the effects of lateral transport of POC from the ECS and identify the nitrogen sources that support the POM production. I applaud their efforts that compiled abundant data for the first time in this region, but recommend the authors revisit these valuable data they collected and interpret them in a better way. The discussion in the present manuscript needs to be strengthened, since there are a lot of handwavy statements and speculated interpretation. I have some major concerns that should be addressed.

**We deeply acknowledge Reviewer #1's comments and appreciate the opportunity to respond to them. Reviewer #1's comments on our analysis helped us improve our manuscript explanation significantly.**

**During the revision process, we found that we had made a mistake in the data sets. We had accidentally put the same dates on the different cruises. We are very sorry for this careless mistake. As a result, some of the results and discussions have been revised.**

**In particular, we found that all the samples classified as class I were collected during the winter. As a result, we have deleted some of the discussion about class I.**

**On the other hand, we could have shown a more favorable conclusion if we had limited the data and used an inadequate statistical approach. However, we believe that this approach would have been dishonest. As a result, our analyses may not be sufficient for Reviewer #1. Therefore, we have revised our manuscript to address Reviewer #1's major concerns. We believe that our manuscript is now improved and better meets Reviewer #1's comments.**

1. The abstract needs to be improved.

**We appreciate the comment. As reviewer#1 commented, our manuscript has a gap between the aims and abstract/conclusions. We have revised our abstract and the aims of this study as follows.**

- 1) One of the major goals in this work, the effects of lateral transport of POC from the ECS, was not indicated in the abstract.

**We appreciate this comment. The horizontal advection of POC was removed from the aims. We believe that the horizontal advective transport of POC from the ECS could not be evaluated in the manuscript because we did not have data in the ECS (L74).**

- 2) And why was the characteristics of class I samples emphasized here?

**In Class I, this very low  $\delta^{15}\text{N}$  value was one of our new findings in this study. To emphasize our consideration, we added the short explanation “whose  $\delta^{15}\text{N}_{\text{POM}}$  showed an outlier of total data sets” (L16).**

- 3) In addition, the authors attributed variations in the  $\delta^{15}\text{NPOM}$  to the temperature and salinity. How do these two parameters change the  $\delta^{15}\text{NPOM}$ ? Do the authors mean different water masses with variable N isotope endmember that support the formation of POM?

**We appreciate this comment. Yes, we considered, and so added the short description as “which suggested that the  $\delta^{15}\text{N}$  of source nitrogen is different among the water masses” (L20–21).**

- 4) At last, their conclusion suggested multiple nitrogen sources contributing to the primary production in the SOJ, which seems to be consistent with the previous findings stated in the introduction. In this regard, the contribution of these plentiful dataset could be limited.

**We are sorry but could not exactly understand the meaning. Previous studies have not reported on the contribution of nitrogen sources to production. We believe that this was the progress of our study, so we keep it.**

2. The interpretation of the  $\delta^{13}\text{CPOM}$  variations.

**We appreciate the comment very much. We revised our manuscript followed by the comments. However, we believe that reviewer#1 might have misunderstood our results and discussions in few cases.**

- 1) I suggest the authors to examine the water masses during the sampling period in the study area, for example, based on T-S diagram. This may help identify the POM sources and the sources of nitrate which is related to the  $\delta^{15}\text{NPOM}$ .

**We deeply appreciate this comment. We agree that the T-S diagram is a useful way to identify water masses, as already written in the manuscript**

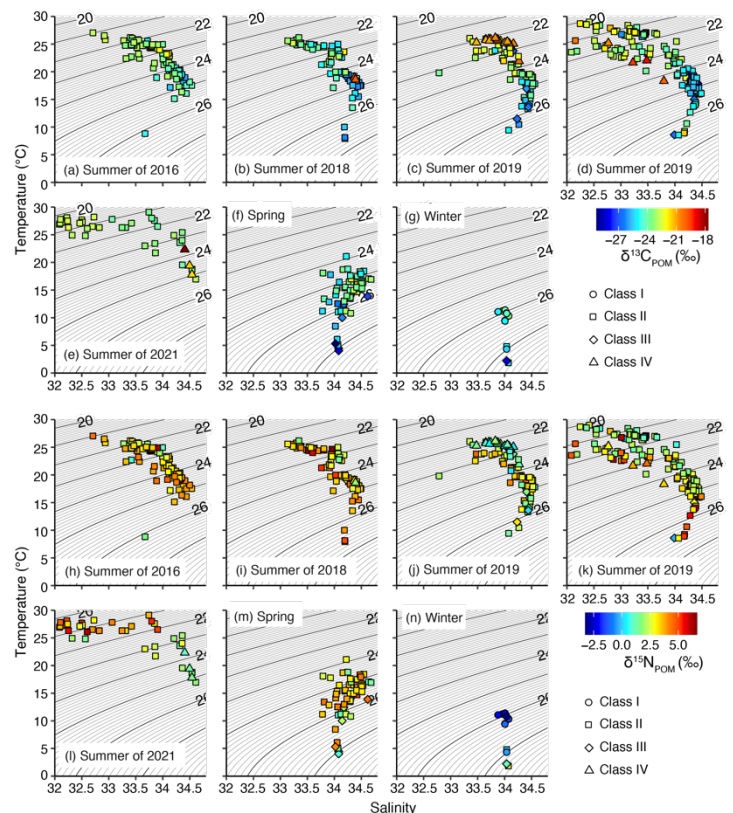

**(L156), and the results are shown in Figure 7a. However, we re-created the T-S diagram as shown in the upper: we put  $\delta^{13}\text{C}$  and  $\delta^{15}\text{N}$  values on the T-S diagram based on reviewer#1 comment. The T-S diagrams did not clearly show the characteristics of  $\delta^{13}\text{C}$  and  $\delta^{15}\text{N}$ . These figures must be more informative than Figure 7, so we revised Figure 7.**

- 2) POM with high  $\delta^{13}\text{C}_{\text{POM}}$  were originated from the less saline ECS waters (Line 300-304). Since the salinity in the northeastern ECS is generally higher than 32 in summer (e.g., Kubota et al., 2015; Yang et al., 2021), it is hard to understand that the water mass with the lower end of salinity (<30) observed in this study originates from the ECS/the Changjiang diluted water.

**We are sorry but we cannot agree with this comment because many studies reported less-saline (<32) water originating in Changjiang in the northeastern part of the ECS and the Tsushima Strait (Morimoto et al., 2009; Umezawa et al., 2014; Kodama et al., 2017). The introduced studies are a snapshot observation (Yang et al., 2021) or a sediment observation (Kubota et al., 2015). Kubota et al. (2015) showed the horizontal distribution of salinity, but references describing the salinity data were not included in the reference lists. So, we did not revise here.**

- 3) Also, when checking the spatial distribution of  $\delta^{13}\text{C}_{\text{POM}}$  in Figure 3d, I do not see higher  $\delta^{13}\text{C}_{\text{POM}}$  at sites close to the Tsushima Strait where the influence of the ECS water may be higher. By contrast, higher  $\delta^{13}\text{C}_{\text{POM}}$  seem to be observed in the eastern part of study area.

**We are afraid that review #1 may have misunderstood our results and discussion. As we had described,  $\delta^{13}\text{C}$  is not only controlled by salinity, but also by temperature and chlorophyll *a* concentration. This means that  $\delta^{13}\text{C}$  was not always associated with the water mass and depended on the *in-situ* conditions as well.**

- 4) Line 312-314: I do not agree that the high  $\delta^{13}\text{C}_{\text{POM}}$  can not be observed at sites with low- nutrient and low-Chl *a*. For example, in the oligotrophic oceans, e.g., the SCS basin (Liu et al., 2007), high  $\delta^{13}\text{C}_{\text{POM}}$  can be detected in the surface water. In addition, considering the observed range of C/N ratio which were mainly close to the Redfield ratio, this may suggest a predominantly marine origin of POM. Liu et al. (2007) suggested that lower  $\delta^{13}\text{C}_{\text{POM}}$  (theoretically down to  $\sim -27\text{‰}$  at 100 m) in the subsurface and deep layers were due to reduced specific growth rate, which may produce larger isotope fractionation. Could this mechanism influence the spatiotemporal variations of  $\delta^{13}\text{C}_{\text{POM}}$  in this study, especially for the data from the subsurface and deep waters and from the growth-limited season (i.e., winter).

**We are sorry but we cannot understand this comment. We believe the reviewer**

**misunderstand here. We did not describe as “high  $\delta^{13}\text{C}_{\text{POM}}$  can not be observed at sites with low-nutrient and low-Chl a,” we described as “the reason for high  $\delta^{13}\text{C}_{\text{POM}}$  values was unidentified.” In addition, we discussed the high  $\delta^{13}\text{C}_{\text{POM}}$  values here and not the low  $\delta^{13}\text{C}_{\text{POM}}$ . We have already discussed that low  $\delta^{13}\text{C}_{\text{POM}}$  may depend on limited growth at L303-309. However, we have not referred to Liu et al. (2007), and we have referred to this in the revised manuscript.**

3. The interpretation of the  $\delta^{15}\text{NPOM}$  variations.

- 1) The  $\delta^{15}\text{NPOM}$  increased with depth, which may imply that the POM degradation preferentially remove  $^{14}\text{N}$  from particles, as indicated by many previous studies (e.g., Casciotti et al., 2008). In this case, the classification of  $\delta^{15}\text{NPOM}$  which combined surface, subsurface and deep samples together would complicate the identification of nitrogen sources.

**We appreciate reviewer#1 comment. The subsurface layer in our study was in the euphotic layer, and Casciotti et al. (2008) showed that degradation occurred in a deeper layer (several hundred meters in depth). Thus, in our case, the degradation processes are hardly considered, except in the deep layer, as shown in the GLM approach. In addition, the classification is not only for the identification of the  $\delta^{15}\text{NPOM}$  origin, but also for statistical analyses. In our data sets, we could not set the statistical distribution of  $\delta^{15}\text{NPOM}$  as a normal distribution when we did not conduct this classification. Even a simple linear model was inappropriate when the data distribution was normal. Therefore, this approach is considered the most appropriate method for statistical analysis.**

- 2) The less saline ECS waters were suggested to be contributed to high  $\delta^{15}\text{NPOM}$  in the SOJ (Line 334-336). Similar to the spatial pattern of  $\delta^{13}\text{CPOM}$ , in the western SOJ close to the Tsushima Strait the  $\delta^{15}\text{NPOM}$  values were lower.

**Again, the spatial distribution of  $\delta^{15}\text{NPOM}$  was not associated with distance from the source, and other factors also contributed.**

- 3) I can not understand the simulation shown in Line 377-389, the authors need to explain in details how the various nitrogen sources change the relationship between the  $\delta^{15}\text{NPOM}$  and nitrate concentration.

**We appreciate this comment. We considered that our descriptions were not enough at all. Thus, we prepared supporting material for this paragraph. In the supporting material, we added the figure shown below. To simplify, when  $\delta^{15}\text{N}_{\text{NO}_3}$  varies widely, the significant negative relationship between  $\delta^{15}\text{NPOM}$  and nitrate concentration could not be observed in some cases. When the  $\delta^{15}\text{N}_{\text{NO}_3}$  had a wider**

range, the  $\delta^{15}\text{N}_{\text{POM}}$  also showed a wider range as well. Since there are multiple nitrogen sources in the Sea of Japan, the  $\delta^{15}\text{N}_{\text{POM}}$  showed a wide range.

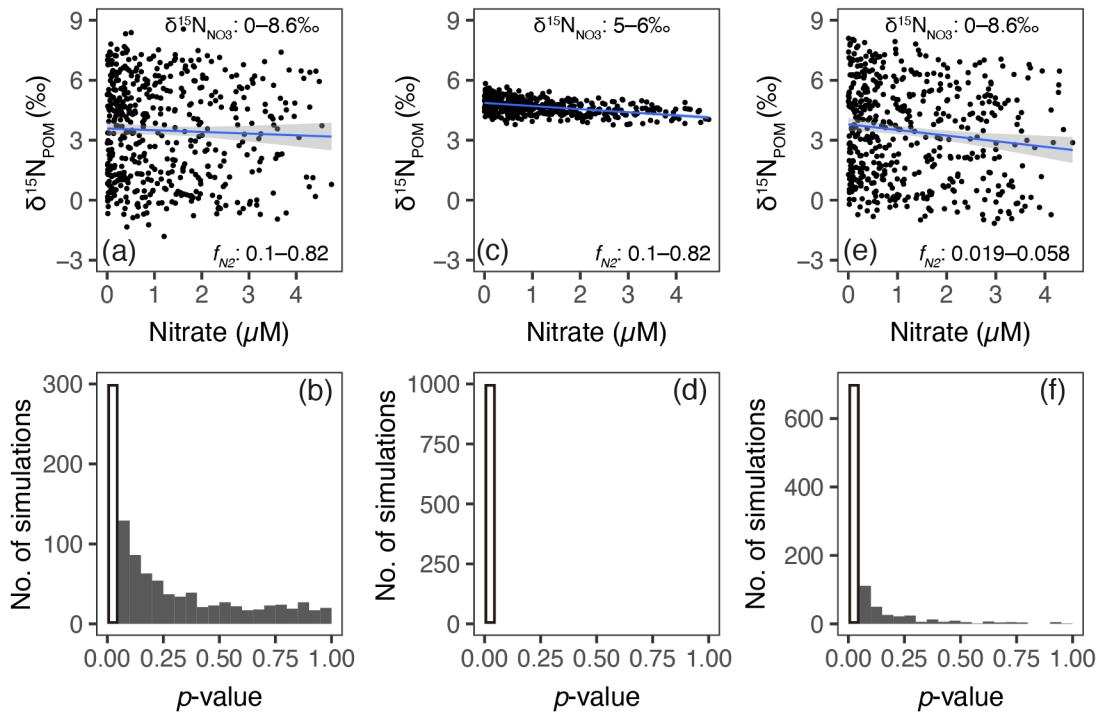

**Figure S2.** The results of the simulations when the  $\delta^{15}\text{N}_{\text{NO}_3}$  varies 0 – 8.3‰ and the contribution of nitrogen fixation ( $f_{\text{N}_2}$ ) was 10–82% (a and b), those  $\delta^{15}\text{N}_{\text{NO}_3}$  varies 5 – 6‰ and  $f_{\text{N}_2}$  was 10–82% (c and d), and those  $\delta^{15}\text{N}_{\text{NO}_3}$  varies 0 – 8.3‰ and  $f_{\text{N}_2}$  was 1.9–5.8% (e and f). (a), (c) and (e) denote the representative result of their relationship of each simulation, and (b), (d) and (f) were the histograms of the  $p$ -values of simulations repeated 1000 times. The open bar in (b), (d) and (f) denote the  $p$ -values were  $\geq 0.05$  (significant), and the closed bars denote  $p$ -values were  $> 0.05$ .

- 4) It is interesting that such  $^{15}\text{N}$ -depleted signals were observed on the POM. The authors excluded the possibility of phytoplankton growth that produces low  $\delta^{15}\text{N}_{\text{POM}}$  in the nitrate-replete condition. However, the Chl *a* concentrations for class I were not low, instead, seem to be highest among the four classes. Also, the authors failed to explain why the ULSW may have a very low  $\delta^{15}\text{N}$  of nitrate.

**We appreciate this comment. We are sorry, but we cannot understand why the reviewer commented on the chlorophyll *a* concentration. In our study, we could not find a significant relationship between  $\delta^{15}\text{N}_{\text{POM}}$  and chlorophyll *a* concentration; thus, whether chlorophyll *a* concentration is high or low is not important. In addition, we already explained why the ULSW might have a very low  $\delta^{15}\text{N}$  of nitrate in the manuscript. It was because the nitrate originating from the Japanese local river is low (L386-390).**

4. At last, for the discussion on the interannual variation in  $\delta^{13}\text{CPOM}$  and  $\delta^{15}\text{NPOM}$ , what is the message the authors intended to deliver?

**We agree that interannual discussion is not necessary. Since our manuscript is long, we cut interannual variations in the revised manuscript.**

### **Minor comments**

Line 17: original

**We revised as “temperature and salinity originating in Japanese local rivers” (L17).**

Line 64:  $\delta^{15}\text{N}_s$ ?

**We thanked the comment. “ $\delta^{15}\text{N}$  values” (L65).**

Line 75: Sampling. I encourage the authors to add a table to summarize the sampling information.

**We thanked this comment. We show it as Table 1.**

Line 102-103: why the detection limit of nutrient was shown in a range?

**It was because the detection limit varied among the measurements. We revised (L100).**

Line 118: The authors did not use the international isotope standards to calibrate the data. How did they prove the precision of these data?

**L-alanine (Shoko Science) was possible to treat as the international reference material. We added L116–L117.**

Line 171 and Line 185: check the significant digitals of SD. And the significant digitals of mean  $\delta^{13}\text{C}$  and  $\delta^{15}\text{N}$  are different.

**The significant digits of standard deviation are very complex. We did not uniform the digits.**

**We uniform the one place of decimal. The difference between  $\delta^{13}\text{C}$  and  $\delta^{15}\text{N}$  was correct. The accuracy of them was one place of decimal.**

Line 205: Explain more about the classification criterion of carbon and nitrogen isotope ratios of POM

**The Gaussian mixed model was determined the number of clusters only based on the Bayesian information criterion (BIC) (L137). So, there is no classification criterion as such a hierarchic clustering analysis.**

Line 226-229: many samples had very low C/N ratio (down to 3), mainly observed at deep depth (Figure 2). Why?

**We are sorry but we have no idea about this. Martiny et al. 2013 reported that a low C:N ratio of POM is observed in the ~100 m depth in the global data sets while the mean value is elevated. Xu et al 2021 reported that regeneration of C:N ratio is different among the depth. Since our profile data was very limited, we could not why it occurred. In addition, only two of nine samples recorded a low C/N ratio.**

Line 302: Strait

**Sorry for the careless mistake (L297).**

Line 303-305: I can not follow the purpose for the seasonality of estuarine  $\delta^{13}\text{C}$ POM mentioned here.

**We considered this description would be an over-discussion. We removed (L300).**

Line 355-356: what is the third hypothesis?

**Sorry, we forgot to revise as two hypotheses (L345).**

Line 375: Any evidence that supports the particles can be entrained from the ECS into the SOJ?

**We cannot clearly understand this comment. Particles must be transported with water.**

Line 382-383: To me, the POM pool is not fully newly produced and is not only supported by new production. So the assumed contribution of nitrogen fixation to the POM pool here, that is 10-82% (Liu et al., 2013), is too high.

**This is an important point. Our description is not enough. The details were added in the supporting material, and we also added the analysis, which contribution was set as low. At first, we know all the primary production is not new production. The regenerated nutrient is contributed to primary production as well. However, the regenerated nutrient was supplied as the new nutrients or via nitrogen fixation at first. Thus, the contribution of N<sub>2</sub> fixation to new production not to primary production is important. However, nitrogen fixation contribution must be lower in the spring, as reviewer #1 suggested. So we added the analysis. We revised the main text (L367–379) as well as Supporting Materials.**

Line 433-434: As mentioned, this study did not identify the main source of nitrogen in this region. The importance of anthropogenic nitrogen inputs in this region was not indicated in this study. I could agree the increasing inputs of anthropogenic nitrogen in the future, but changes in new nitrogen inputs from other sources should be considered. For instance, nitrogen fixation may be inhibited due to higher inputs of anthropogenic nitrogen. In addition, warming-induced stratification in the water column may prevent upwelled nitrate from the subsurface.

**We appreciate this comment. The review #1 comment is correct and we easily described this sentence. We revised the sentence as “the anthropogenic-nitrogen-induced production in the SOJ is expected to increase. As a result, we must evaluate the impact of “increased” production on the biogeochemical cycles and ecosystems in the SOJ” (L414–417).**
